# Supplementary material for: Chemokine Receptors CCR6 and PD1 Blocking scFv E27 Enhances Anti-EGFR CAR-T Therapeutic Efficacy in a Preclinical Model of Human Non-Small Cell Lung Carcinoma
Source: MDPI journal article supplement (doi:10.3390/ijms24065424), 2023-03-12
Supplement: s1 [file s1]

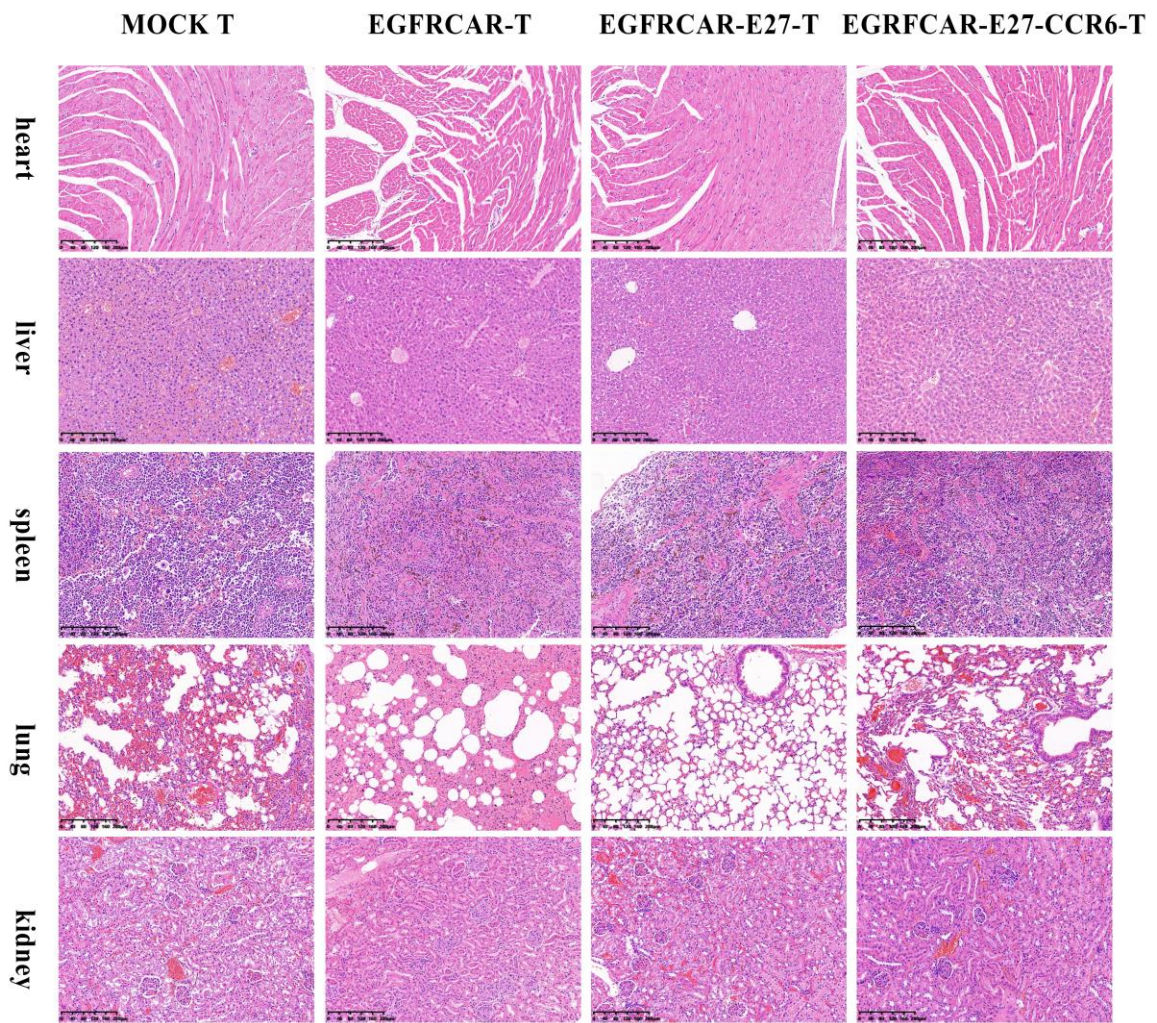

**Figure S1.** H&E staining was performed on major organs of mice, the safety of the CAR-T cells could be preliminarily evaluated based on the morphology and arrangement of the cells.
